# Supplementary material for: Carbon Nanotube Supported Molybdenum Carbide as Robust Electrocatalyst for Efficient Hydrogen Evolution Reaction
Source: MDPI journal article supplement (doi:10.3390/molecules28010192), 2022-12-26
Supplement: s1 [file s1]

# Carbon Nanotube Supported Molybdenum Carbide as Robust Electrocatalyst for Efficient Hydrogen Evolution Reaction

Yunjie Huang <sup>1</sup>, Yaqi Bao <sup>1</sup>, Tieqi Huang <sup>2</sup>, Chengzhi Hu <sup>1</sup>, Haiou Qiu <sup>1</sup>, Hongtao Liu <sup>2,\*</sup>

<sup>1</sup> Faculty of Materials Science and Chemistry, China University of Geosciences, Wuhan 430074, China

<sup>2</sup> College of Chemistry and Chemical Engineering, Central South University, Changsha 410083, China

\* **Correspondance:** liuht@csu.edu.cn

Table S1 Comparison of the catalytic performance for HER between carbon supported molybdenum carbide of this work and reported recently

| Catalyst                                 | $\eta_{10}$<br>(mV) | Tafel slope<br>(mV dec <sup>-1</sup> ) | CV cycles for<br>stability test | CV potential range for<br>stability test (V) | Electrolyte                         | Reference |
|------------------------------------------|---------------------|----------------------------------------|---------------------------------|----------------------------------------------|-------------------------------------|-----------|
| Mo <sub>2</sub> C/N-CNTs                 | 137                 | 50                                     | 20000                           | -0.3~0.3                                     | 0.5M H <sub>2</sub> SO <sub>4</sub> | This work |
|                                          | 145                 | 47                                     | 10000                           | -0.3~0.3                                     | 1M KOH                              |           |
| Mo <sub>2</sub> C/CNT-RGO                | 145                 | 64                                     | 1000                            | -0.3~0.2                                     | 0.5M H <sub>2</sub> SO <sub>4</sub> | 1         |
| N-Mo <sub>x</sub> C@C HSs                | 172                 | 60                                     | \                               | \                                            | 0.5M H <sub>2</sub> SO <sub>4</sub> | 2         |
| Co/Mo <sub>2</sub> C@N-CNTs              | 170                 | 92                                     | 1000                            | \                                            | 1M KOH                              | 3         |
| Mo <sub>2</sub> C/CNTs                   | 255                 | 103                                    | 1000                            | \                                            | 0.5M H <sub>2</sub> SO <sub>4</sub> | 4         |
| MoC <sub>x</sub> /N-CNTs                 | 136                 | 56                                     | 3000                            | -0.4~0                                       | 0.5M H <sub>2</sub> SO <sub>4</sub> | 5         |
| N <sub>3</sub> P-Mo <sub>x</sub> C/NF    | 107                 | 65                                     | 1000                            | -0.2~0.2                                     | 0.5M H <sub>2</sub> SO <sub>4</sub> | 6         |
|                                          | 135                 | 57                                     | 1000                            | \                                            | 1M KOH                              |           |
| Mo <sub>2</sub> C/CNTs                   | 110                 | 51                                     | 1000                            | \                                            | 0.5M H <sub>2</sub> SO <sub>4</sub> | 7         |
| Mo <sub>2</sub> N -Mo <sub>2</sub> C/HGr | 157                 | 55                                     | 2000                            | \                                            | 0.5M H <sub>2</sub> SO <sub>4</sub> | 8         |
|                                          | 154                 | 68                                     | 2000                            | \                                            | 1M KOH                              |           |
| Mo <sub>2</sub> C@N-DC/G                 | 107                 | 66                                     | 1000                            | 0.17~0.27                                    | 0.5M H <sub>2</sub> SO <sub>4</sub> | 9         |
| Mo <sub>2</sub> C/Carbon cloth           | 72                  | 53                                     | 5000                            | -0.3~0                                       | 1M KOH                              | 10        |
| Mo <sub>2</sub> C/CNTs                   | 112                 | 54                                     | 1000                            | \                                            | 0.5M H <sub>2</sub> SO <sub>4</sub> | 11        |

|                           |     |    |      |           |                                     |    |
|---------------------------|-----|----|------|-----------|-------------------------------------|----|
| Mo <sub>2</sub> C/CNT-RGO | 200 | 67 | \    | \         | 0.5M H <sub>2</sub> SO <sub>4</sub> | 12 |
| Mo <sub>2</sub> C/NC      | 152 | 58 | \    | \         | 0.5M H <sub>2</sub> SO <sub>4</sub> | 13 |
|                           | 135 | 56 | 1000 | -0.6~0    | 1M KOH                              |    |
| Mo <sub>2</sub> C/N-CNTs  | 195 | 75 | 1000 | \         | 0.5M H <sub>2</sub> SO <sub>4</sub> | 14 |
| Mo <sub>2</sub> C/B,N-C   | 184 | 68 | 3000 | \         | 0.5M H <sub>2</sub> SO <sub>4</sub> | 15 |
|                           | 145 | 57 | 3000 | \         | 1M KOH                              |    |
| Mo <sub>2</sub> C/NC      | 187 |    | 1000 | \         | 0.5M H <sub>2</sub> SO <sub>4</sub> | 16 |
|                           | 116 | 48 | 1000 | \         | 1M KOH                              |    |
| N,P-Mo <sub>2</sub> C/C   | 103 | 57 | 2000 | -0.4~0.05 | 0.5M H <sub>2</sub> SO <sub>4</sub> | 17 |
|                           | 80  | 46 | \    | \         | 1M KOH                              |    |

## Reference

1. Lee, G. H.; Lee, M. H.; Kim, Y.; Lim, H. K.; Youn, D. H., Facile synthesis of nanostructured molybdenum carbide/nitrogen-doped CNT-RGO composite via a modified urea glass route for efficient hydrogen evolution. *J. Alloys Compd.* **2019**, *805*, 113-119.
2. Xiong, T.; Jia, J.; Wei, Z.; Zeng, L.; Deng, Y.; Zhou, W.; Chen, S., N-doped carbon-wrapped Mo C heterophase sheets for high-efficiency electrochemical hydrogen production. *Chem. Eng. J.* **2019**, *358*, 362-368.
3. Ouyang, T.; Ye, Y. Q.; Wu, C. Y.; Xiao, K.; Liu, Z. Q., Heterostructures composed of n-doped carbon nanotubes encapsulating cobalt and beta-Mo<sub>2</sub>C nanoparticles as bifunctional electrodes for water splitting. *Angew. Chem. Int. Ed.* **2019**, *58* (15), 4923-4928.
4. Pu, J. X.; Cao, J.; Ma, L.; Zhou, K. C.; Yu, Z. M.; Yin, D. F.; Wei, Q. P., Novel three-dimensional Mo<sub>2</sub>C/carbon nanotubes composites for hydrogen evolution reaction. *Mater. Lett.* **2020**, *277*.
5. Jo, H. M.; Kim, Y.; Youn, D. H., One-pot synthesis of molybdenum carbide/N-doped carbon nanotube composite using nitrilotriacetic acid for efficient hydrogen evolution. *J. Alloys Compd.* **2021**, *855*.
6. Ji, L.; Wang, J.; Teng, X.; Dong, H.; He, X.; Chen, Z., N,P-Doped molybdenum carbide nanofibers for efficient hydrogen production. *Acs Appl. Mater. Interfaces* **2018**, *10* (17), 14632-14640.
7. Adam, A.; Suliman, M. H.; Awwad, M.; Siddiqui, M. N.; Yamani, Z. H.; Qamar, M., Controlled growth of small and uniformly dispersed Mo<sub>2</sub>C on carbon nanotubes as high performance electrocatalyst for the hydrogen evolution reaction. *Int. J. Hydrogen Energy* **2019**, *44* (23), 11797-11807.
8. Yan, H.; Xie, Y.; Jiao, Y.; Wu, A.; Tian, C.; Zhang, X.; Wang, L.; Fu, H., Holey reduced graphene oxide coupled with an Mo<sub>2</sub>N-Mo<sub>2</sub>C heterojunction for efficient hydrogen evolution. *Adv. Mater.* **2018**, *30*, 29164704.

9. Wang, B.; Wu, X. Y.; Zhang, X. Y.; Pang, G. G.; Li, S. M., Mo<sub>2</sub>C-embedded biomass-derived honeycomb-like nitrogen-doped carbon nanosheet/graphene aerogel films for highly efficient electrocatalytic hydrogen evolution. *New J. Chem.* **2020**, *44* (3), 1147-1156.
10. He, M. C.; Shi, H. Y.; Wang, P.; Sun, X. D.; Gao, B., Porous Molybdenum carbide nanostructures synthesized on carbon cloth by CVD for efficient hydrogen production. *Chem. Eur. J.* **2019**, *25* (70), 16106-16113.
11. Hu, Y.; Guan, D. G.; Yu, B.; Hou, W. Q.; Zheng, B. J.; Zhang, W. L.; Chen, Y. F., Scalable synthesis of Mo<sub>2</sub>C/CNT networks as highly efficient and stable electrocatalyst for hydrogen evolution reaction. *Electrochim. Acta* **2018**, *263*, 192-200.
12. Lee, Y. H.; Brahma, S.; Huang, P. C.; Wang, S. C.; Huang, J. L., Molybdenum carbide (Mo<sub>2</sub>C) and reduced graphene oxide (rGO) nano-composites as an efficient electrocatalyst for water splitting. *Mater. Lett.* **2022**, *316*, 131934.
13. Wang, J.; Li, S. W.; Hu, J.; Niu, S. Q.; Li, Y. Z.; Xu, P., Acid-directed morphology control of molybdenum carbide embedded in a nitrogen doped carbon matrix for enhanced electrocatalytic hydrogen evolution. *Inorg. Chem. Front.* **2020**, *7* (19), 3620-3626.
14. Song, Y. J.; Ren, J. T.; Yuan, G. G.; Yao, Y. L.; Liu, X. Y.; Yuan, Z. Y., Facile synthesis of Mo<sub>2</sub>C nanoparticles on N-doped carbon nanotubes with enhanced electrocatalytic activity for hydrogen evolution and oxygen reduction reactions. *J. Energy Chem.* **2019**, *38*, 68-77.
15. Wu, S. F.; Chen, M. Y.; Wang, W. W.; Zhou, J. B.; Tang, X. R.; Zhou, D. L.; Liu, C., Molybdenum carbide nanoparticles assembling in diverse heteroatoms doped carbon matrix as efficient hydrogen evolution electrocatalysts in acidic and alkaline medium. *Carbon* **2021**, *171*, 385-394.
16. Wang, S. Q.; Li, Y. Z.; Xie, J.; Hao, A. Z.; Cao, Y. L., One-pot solution-free construction for hybrids of molybdenum carbide nanoparticles and porous N-doped carbon nanoplates as efficient electrocatalyst of hydrogen evolution. *J. Alloys Compd.* **2021**, *861*, 157935.

17. Wang, J. H.; Wei, H. F.; Chen, X.; Chen, C. S.; Chen, X. A., Facile preparation of N, P co-doped molybdenum carbide/porous carbon rough microspheres for efficient electrocatalytic hydrogen evolution. *Int. J. Hydrogen Energy* **2020**, *45* (1), 595-604.

Table 1 e Comparison of the catalytic activity for HER between NP-Mo<sub>2</sub>C/PCMS-2-36-750 and other biomass-derived carbon/Mo<sub>2</sub>C and several Mo<sub>2</sub>C-based catalysts reported recently.

The calibration of SCE reference electrode was tested in a standard three-electrode system with two polished Pt electrodes and our SCE as the working, counter electrodes and reference electrode, respectively. Electrolytes were pre-purged high purity hydrogen to form a saturated solution of hydrogen. Then, linear scanning voltammetry (LSV) was performed at a scan rate of 0.1 mV/s. The potential at the current of zero was considered as the thermodynamic potential (vs. SCE) and was found to be -0.262 V and -1.04 V in 0.5 M H<sub>2</sub>SO<sub>4</sub> and 1 M KOH solution, respectively.

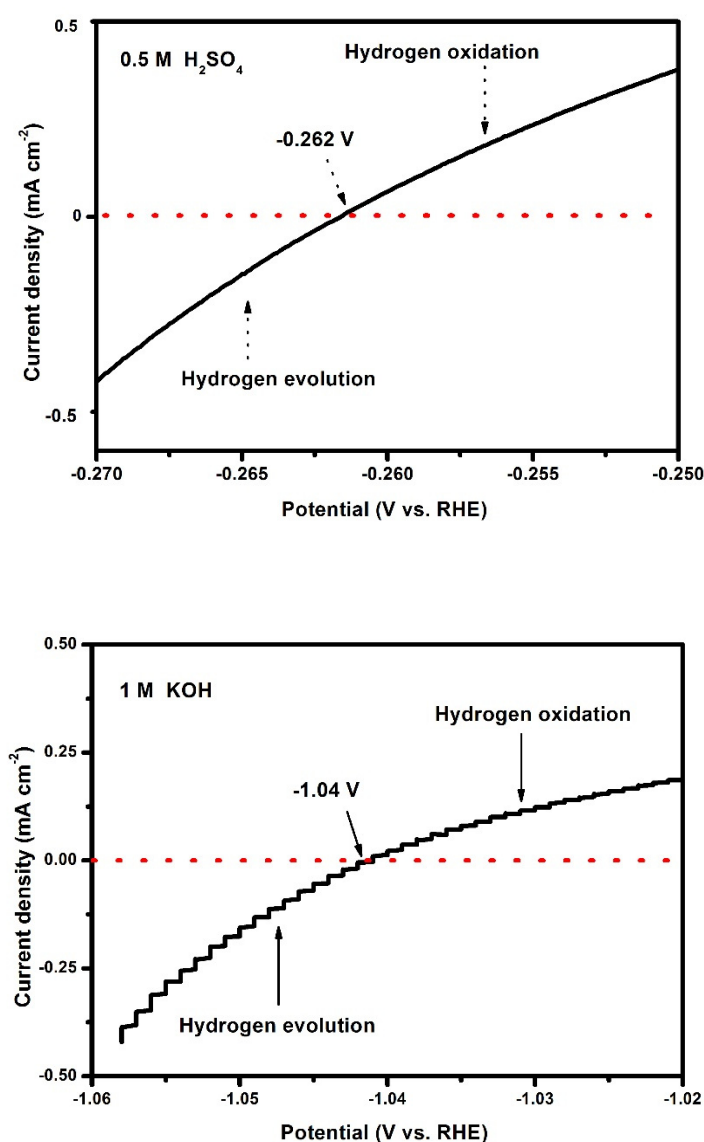

Figure S1 Calibration of SCE vs RHE.

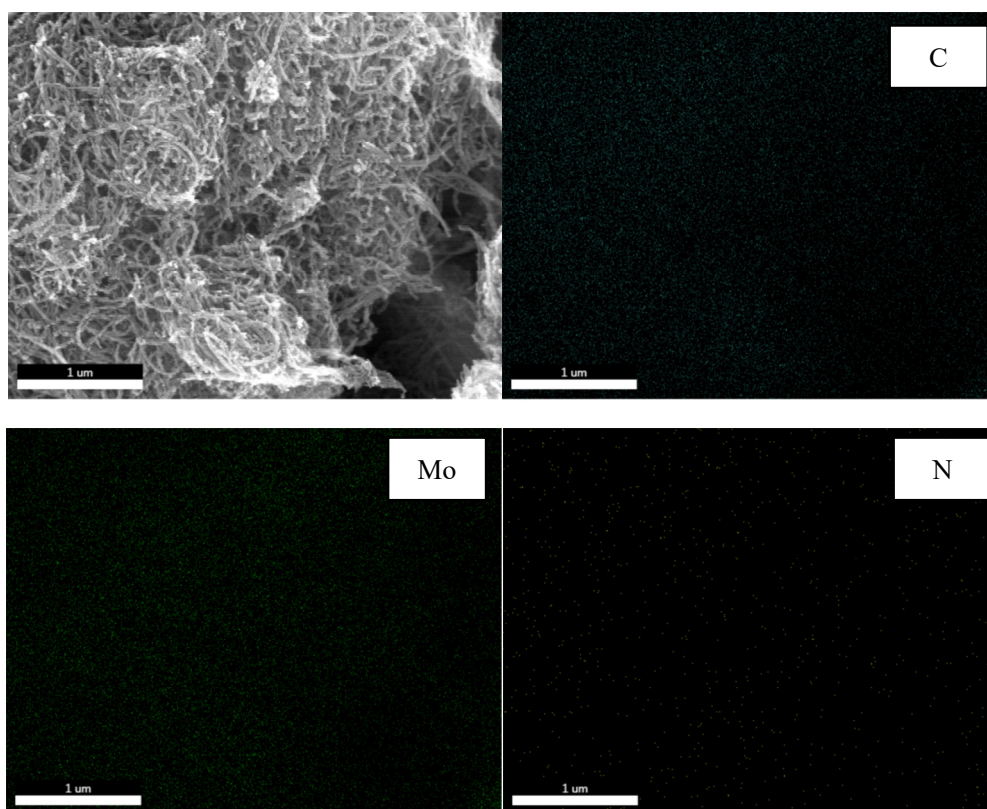

Figure S2 SEM image and corresponding elemental distributions.



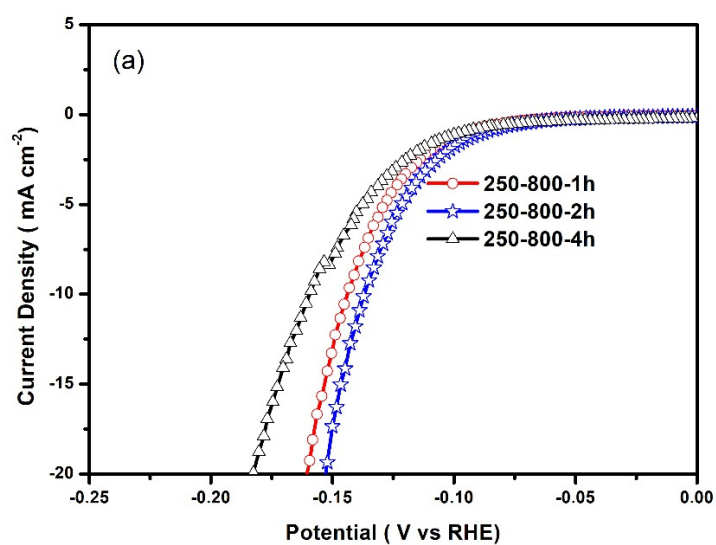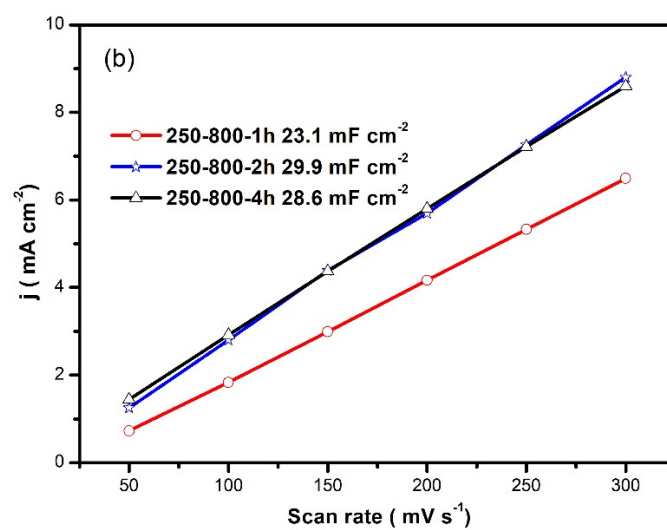

Figure S3 (a) polarization curves and (b) capacitive plots at 0.15 V of catalysts in 0.5 M  $\text{H}_2\text{SO}_4$  solution.

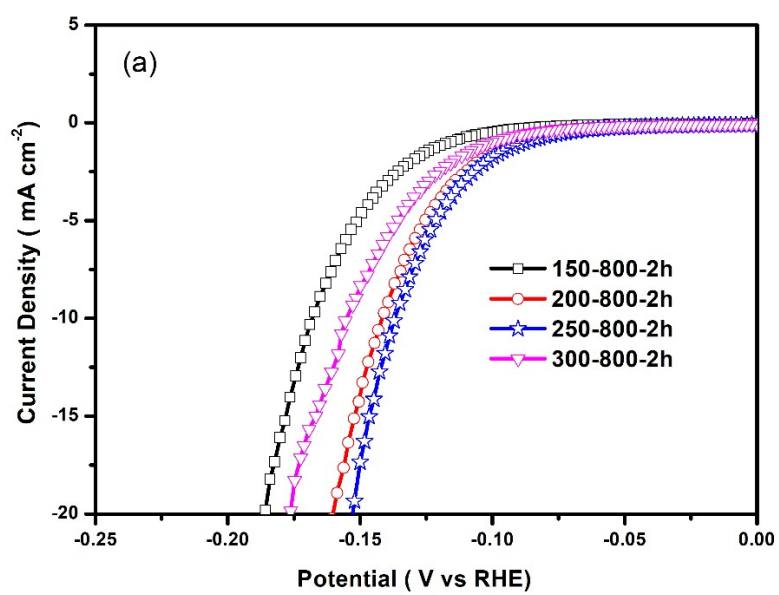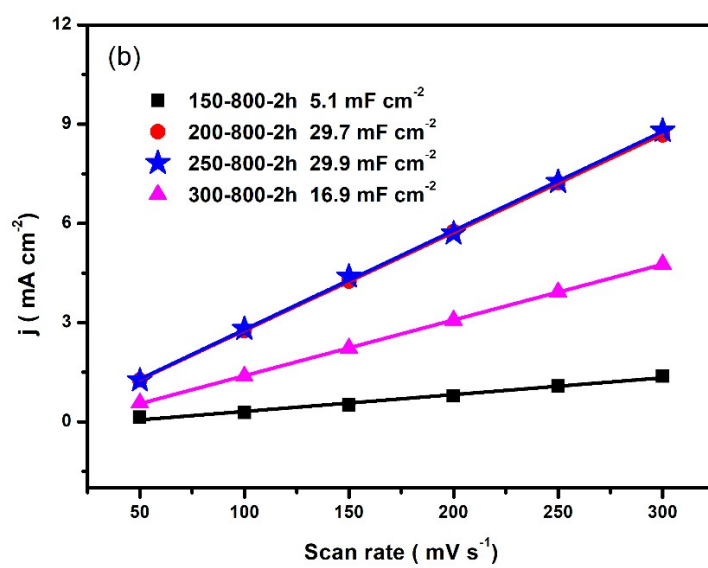

Figure S4 (a) polarization curves and (b) capacitive plots at 0.15 V of catalysts in 0.5 M  $\text{H}_2\text{SO}_4$  solution.

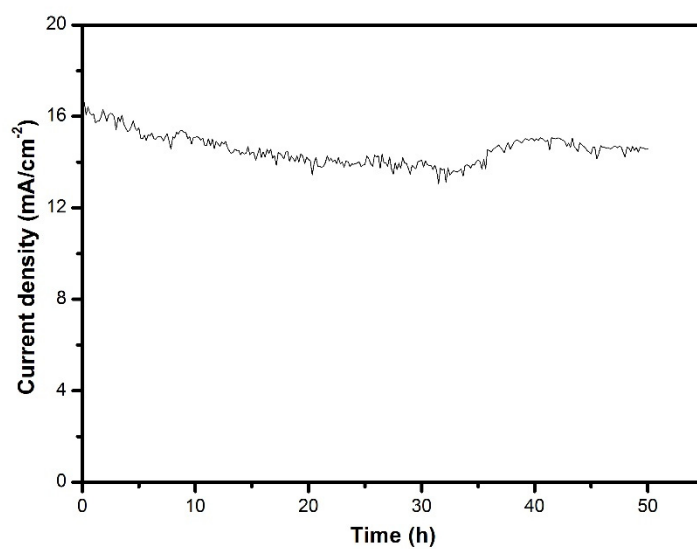

Figure S5 Time dependence of current density over 250-800-2h catalyst during HER at -0.15 V in 0.5 M H<sub>2</sub>SO<sub>4</sub> solution
